# Supplementary material for: The Alaiz experiment: untangling multi-scale stratified flows over complex terrain
Source: Copernicus journal article supplement (doi:10.5194/wes-5-1793-2020), 2020-12-23
Supplement: Supplementary file 1 [file wes-5-1793-2020-supplement.zip]

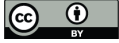

## *Supplement of*

# **The Alaiz experiment: untangling multi-scale stratified flows over complex terrain**

**Pedro Santos et al.**

*Correspondence to:* Pedro Santos (paas@dtu.dk) and Jakob Mann (jmsq@dtu.dk)

- wes-5-1793-2020-supplement-title-page.pdf
- Ztransect\_UTM\_WGS84.xlsx

The copyright of individual parts of the supplement might differ from the CC BY 4.0 License.
